# Supplementary material
Source: PubMed Central journal article supplement (PMC2917966)
Supplement: 091534_1.pdf [file 091534_1.pdf]

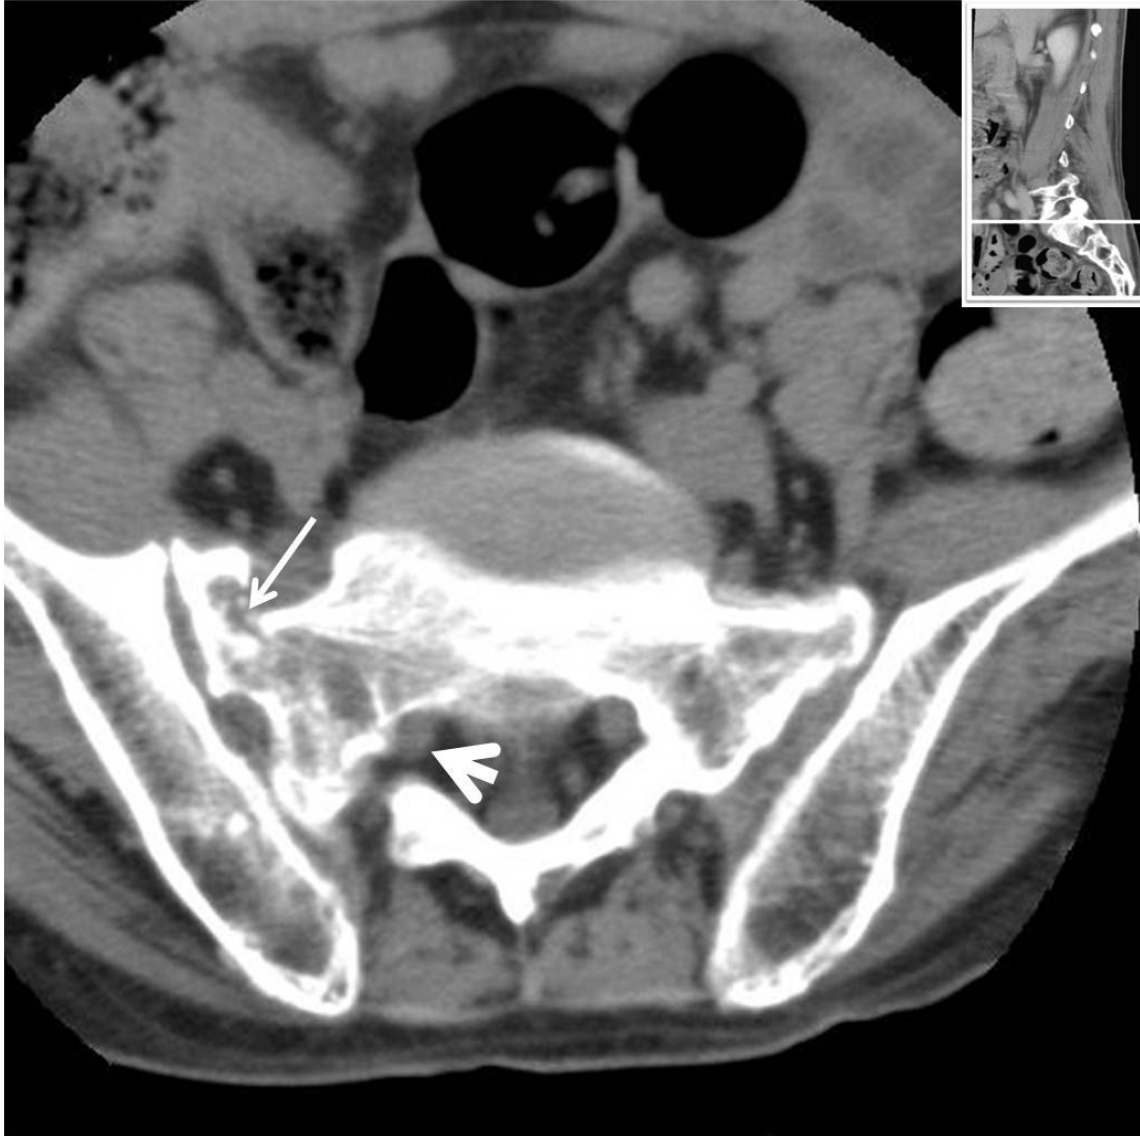

**Appendix 1:** A contrast-enhanced computed tomographic scan of the lumbar spine of a 70-year-old man with multiple injuries and right sciatica, showing a displaced sacral fracture (arrow) with compression of the S1 ventral ramus (arrowhead).
